# Supplementary material for: Targeted genomic CRISPR-Cas9 screen identifies MAP4K4 as essential for glioblastoma invasion
Source: PubMed Central journal article supplement (PMC6768851; doi:10.1038/s41598-019-50160-w), 2019-09-30

**Title: Targeted genomic CRISPR-Cas9 screen identifies MAP4K4 as essential for glioblastoma invasion**

**Authors:** Laura M Prolo<sup>1</sup>, Amy Li<sup>2</sup>, Scott F Owen<sup>3</sup>, Jonathon J Parker<sup>1</sup>, Kara Foshay<sup>4</sup>, Ryan T Nitta<sup>1</sup>, David W Morgens<sup>2</sup>, Sara Bolin<sup>1</sup>, Christy M Wilson<sup>1</sup>, Johana C M Vega L<sup>1</sup>, Emily J Luo<sup>1</sup>, Gigi Nwagbo<sup>1</sup>, Allen Waziri<sup>4</sup>, Gordon Li<sup>1</sup>, Richard J Reimer<sup>5</sup>, Michael C Bassik<sup>2</sup>, Gerald A Grant\*<sup>1</sup>

<sup>1</sup>Stanford University School of Medicine, Department of Neurosurgery, 300 Pasteur Dr, Stanford, CA 94305

<sup>2</sup>Stanford University School of Medicine, Department of Genetics, 291 Campus Dr, Stanford, CA 94305

<sup>3</sup>J. David Gladstone Institute of Neurological Disease, 1650 Owens St, San Francisco, CA 94158

<sup>4</sup>Inova Neuroscience and Spine Institute, Inova Health Systems, 8110 Gatehouse Rd, Falls Church, VA, 22042

<sup>5</sup>Stanford University School of Medicine, Department of Neurology, 300 Pasteur Dr, Stanford, CA 94305

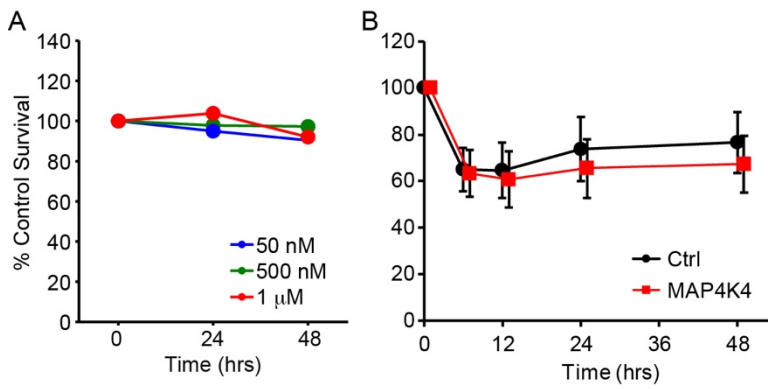

**Supplementary Figure 1: U138 cell viability in the presence of MAP4K4 inhibitor or MAP4K4 knock-out.** (A) Quantification of U138 cell viability in presence of PF06260933 dihydrochloride normalized to control over 48 hours. Data displayed as mean with standard error, n=4 for each drug concentration and time point. (B) Quantification of U138 Cas9-control (black) or U138 Cas9-sgMAP4K4 (red) viability normalized to t=0. Data are mean with standard error, n=12 for each time point. There was no significant difference in viability between control and MAP4K4 knock-out lines,  $p > 0.05$ .

Full size immunoblots are presented below:

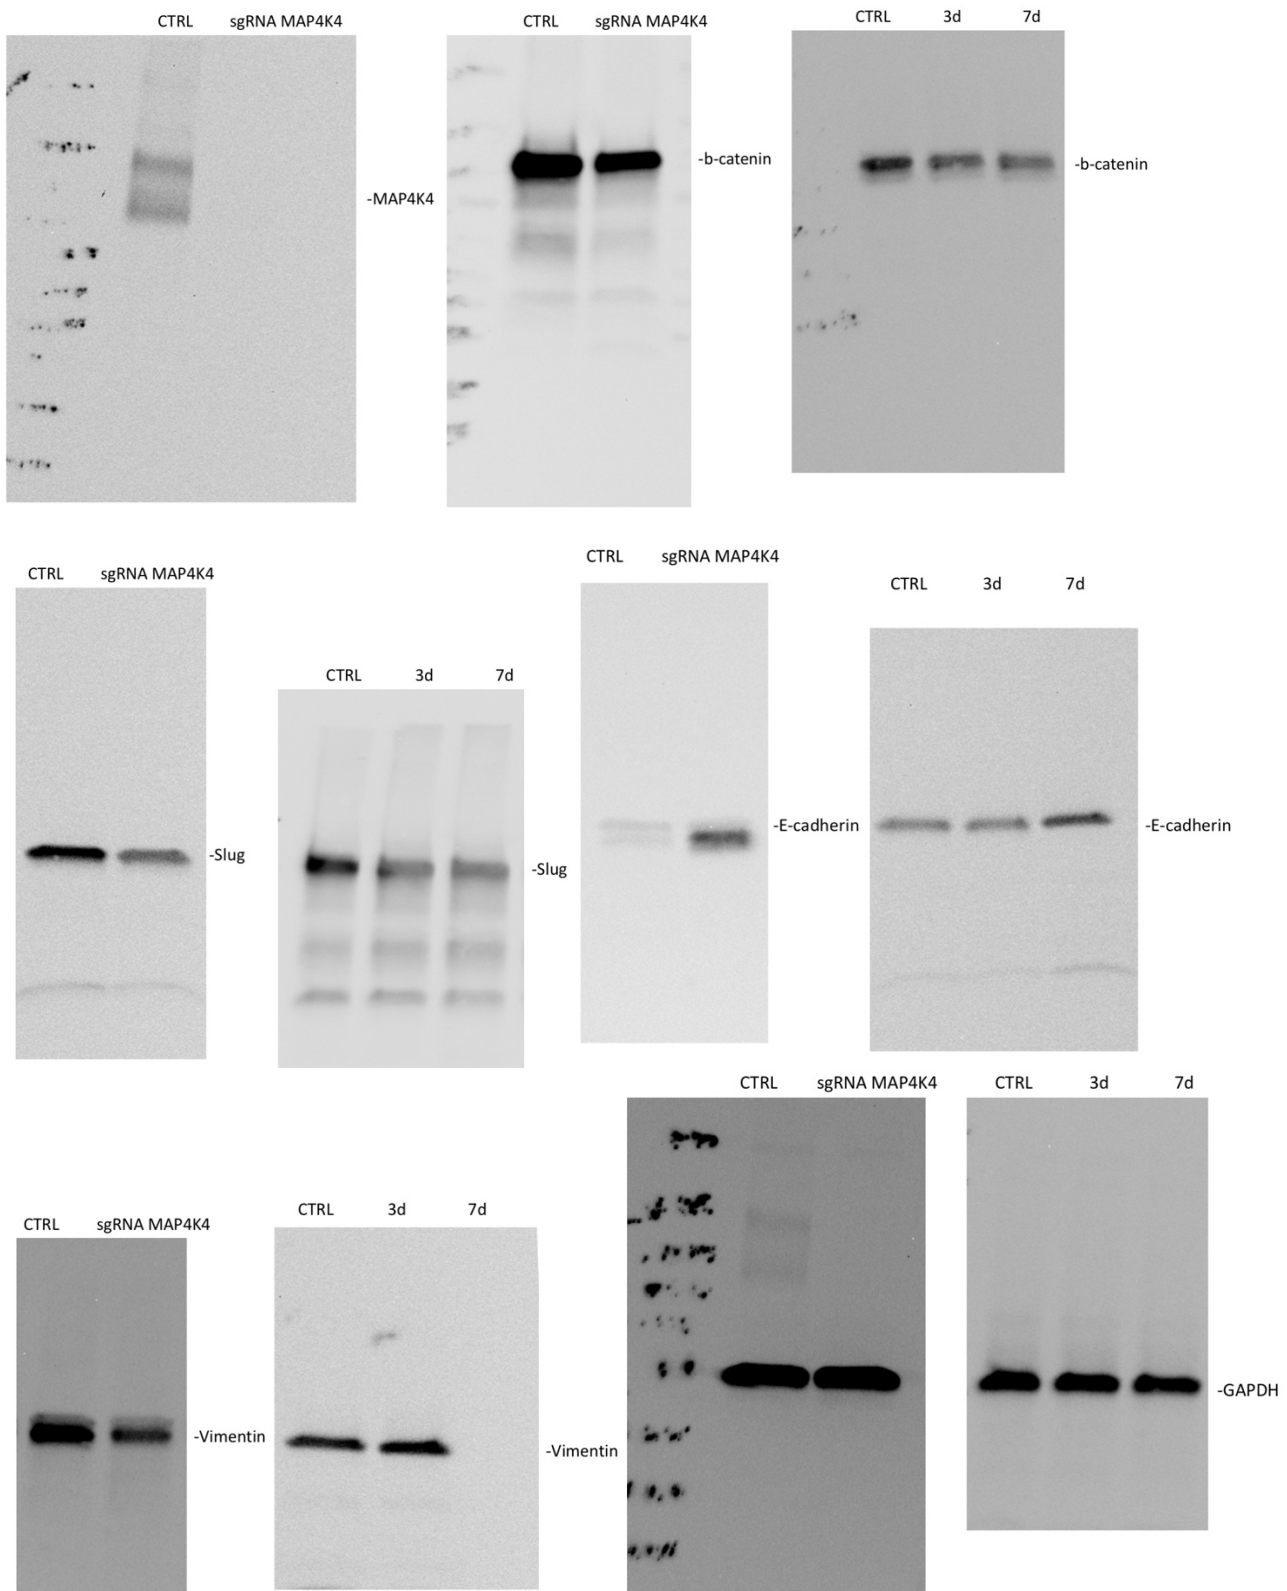

Supplement: 41598_2019_50160_MOESM1_ESM.pdf [file 41598_2019_50160_MOESM1_ESM.pdf]
