# Supplementary material for: Targeted genomic CRISPR-Cas9 screen identifies MAP4K4 as essential for glioblastoma invasion
Source: PubMed Central journal article supplement (PMC6768851; doi:10.1038/s41598-019-50160-w), 2019-09-30
Supplement: 41598_2019_50160_MOESM2_ESM.pdf [file 41598_2019_50160_MOESM2_ESM.pdf]

**Title: Targeted genomic CRISPR-Cas9 screen identifies MAP4K4 as essential for glioblastoma invasion**

**Authors:** Laura M Prolo<sup>1</sup>, Amy Li<sup>2</sup>, Scott F Owen<sup>3</sup>, Jonathon J Parker<sup>1</sup>, Kara Foshay<sup>4</sup>, Ryan T Nitta<sup>1</sup>, David W Morgens<sup>2</sup>, Sara Bolin<sup>1</sup>, Christy M Wilson<sup>1</sup>, Johana C M Vega L<sup>1</sup>, Emily J Luo<sup>1</sup>, Gigi Nwagbo<sup>1</sup>, Allen Waziri<sup>4</sup>, Gordon Li<sup>1</sup>, Richard J Reimer<sup>5</sup>, Michael C Bassik<sup>2</sup>, Gerald A Grant\*<sup>1</sup>

<sup>1</sup>Stanford University School of Medicine, Department of Neurosurgery, 300 Pasteur Dr, Stanford, CA 94305

<sup>2</sup>Stanford University School of Medicine, Department of Genetics, 291 Campus Dr, Stanford, CA 94305

<sup>3</sup>J. David Gladstone Institute of Neurological Disease, 1650 Owens St, San Francisco, CA 94158

<sup>4</sup>Inova Neuroscience and Spine Institute, Inova Health Systems, 8110 Gatehouse Rd, Falls Church, VA, 22042

<sup>5</sup>Stanford University School of Medicine, Department of Neurology, 300 Pasteur Dr, Stanford, CA 94305

**Supplementary Table 1: Genes targeted by sgRNAs disenriched from the library**

| Symbol     | GeneInfo                                                                               | Function                                                                                                                                                                                                                                                                                    |
|------------|----------------------------------------------------------------------------------------|---------------------------------------------------------------------------------------------------------------------------------------------------------------------------------------------------------------------------------------------------------------------------------------------|
| RAB4B      | RAB4B, member RAS oncogene family                                                      | molecular_function GTP binding                                                                                                                                                                                                                                                              |
| PTPN20B    | protein tyrosine phosphatase, non-receptor type 20B                                    | protein tyrosine phosphatase activity                                                                                                                                                                                                                                                       |
| NEDD8-MDP1 | NEDD8-MDP1 readthrough                                                                 | None                                                                                                                                                                                                                                                                                        |
| FDX1L      | ferredoxin 1-like                                                                      | electron carrier activity metal ion binding 2 iron, 2 sulfur cluster binding                                                                                                                                                                                                                |
| GOSR2      | golgi SNAP receptor complex member 2                                                   | transporter activity                                                                                                                                                                                                                                                                        |
| CDY2A      | chromodomain protein, Y-linked, 2A                                                     | None                                                                                                                                                                                                                                                                                        |
| STX16      | syntaxin 16                                                                            | SNAP receptor activity protein binding                                                                                                                                                                                                                                                      |
| SLC25A10   | solute carrier family 25 (mitochondrial carrier; dicarboxylate transporter), member 10 | dicarboxylic acid transmembrane transporter activity protein binding                                                                                                                                                                                                                        |
| VKORC1     | vitamin K epoxide reductase complex, subunit 1                                         | vitamin-K-epoxide reductase (warfarin-sensitive) activity quinone binding                                                                                                                                                                                                                   |
| UGT1A8     | UDP glucuronosyltransferase 1 family, polypeptide A8                                   | retinoic acid binding enzyme inhibitor activity steroid binding fatty acid binding drug binding glucuronosyltransferase activity enzyme binding protein homodimerization activity protein homodimerization activity protein heterodimerization activity protein heterodimerization activity |
| MRPL30     | mitochondrial ribosomal protein L30                                                    | None                                                                                                                                                                                                                                                                                        |
| CDY1       | chromodomain protein, Y-linked, 1                                                      | None                                                                                                                                                                                                                                                                                        |
| HOGA1      | 4-hydroxy-2-oxoglutarate aldolase 1                                                    | 4-hydroxy-2-oxoglutarate aldolase activity 4-hydroxy-2-oxoglutarate aldolase activity protein homodimerization activity                                                                                                                                                                     |
| DDX19B     | DEAD (Asp-Glu-Ala-Asp) box polypeptide 19B                                             | RNA binding helicase activity ATP binding                                                                                                                                                                                                                                                   |
| SQRDL      | sulfide quinone reductase-like (yeast)                                                 | sulfide:quinone oxidoreductase activity                                                                                                                                                                                                                                                     |
| CCL3L1     | chemokine (C-C motif) ligand 3-like 1                                                  | None                                                                                                                                                                                                                                                                                        |
| GATC       | glutamyl-tRNA(Gln) amidotransferase, subunit C                                         | ATP binding glutamyl-tRNA synthase (glutamine-hydrolyzing) activity                                                                                                                                                                                                                         |
| PRY2       | PTPN13-like, Y-linked 2                                                                | None                                                                                                                                                                                                                                                                                        |
| CSNK2B     | casein kinase 2, beta polypeptide                                                      | protein serine/threonine kinase activity receptor binding protein binding transcription factor binding protein kinase regulator activity protein domain specific binding identical protein binding metal ion binding                                                                        |
| PPAN       | peter pan homolog (Drosophila)                                                         | poly(A) RNA binding                                                                                                                                                                                                                                                                         |
| TMX2       | thioredoxin-related transmembrane protein 2                                            | molecular_function                                                                                                                                                                                                                                                                          |
| BLOC1S5    | biogenesis of lysosomal organelles complex-1, subunit 5, muted                         | protein binding                                                                                                                                                                                                                                                                             |
| ARL17A     | ADP-ribosylation factor-like 17A                                                       | None                                                                                                                                                                                                                                                                                        |
| TIMM23     | translocase of inner mitochondrial membrane 23 homolog (yeast)                         | protein binding P-P-bond-hydrolysis-driven protein transmembrane transporter activity                                                                                                                                                                                                       |

|         |                                                                   |                                                                                                                                                                                                                                                            |
|---------|-------------------------------------------------------------------|------------------------------------------------------------------------------------------------------------------------------------------------------------------------------------------------------------------------------------------------------------|
| KPNB1   | karyopherin (importin) beta 1                                     | protein binding nuclear localization sequence binding zinc ion binding Ran GTPase binding protein transporter activity enzyme binding protein domain specific binding poly(A) RNA binding                                                                  |
| TRAPPC5 | trafficking protein particle complex 5                            | None                                                                                                                                                                                                                                                       |
| PSMA2   | proteasome (prosome, macropain) subunit, alpha type, 2            | threonine-type endopeptidase activity protein binding                                                                                                                                                                                                      |
| SNRPD2  | small nuclear ribonucleoprotein D2 polypeptide 16.5kDa            | protein binding poly(A) RNA binding                                                                                                                                                                                                                        |
| TMEM141 | transmembrane protein 141                                         | None                                                                                                                                                                                                                                                       |
| HSPA5   | heat shock 70kDa protein 5 (glucose-regulated protein, 78kDa)     | glycoprotein binding calcium ion binding protein binding ATP binding ATPase activity enzyme binding protein domain specific binding ubiquitin protein ligase binding ribosome binding unfolded protein binding chaperone binding misfolded protein binding |
| AMY1A   | amylase, alpha 1A (salivary)                                      | None                                                                                                                                                                                                                                                       |
| BCKDHA  | branched chain keto acid dehydrogenase E1, alpha polypeptide      | alpha-ketoacid dehydrogenase activity 3-methyl-2-oxobutanoate dehydrogenase (2-methylpropanoyl-transferring) activity protein binding carboxy-lyase activity metal ion binding                                                                             |
| NDUFC2  | NADH dehydrogenase (ubiquinone) 1, subcomplex unknown, 2, 14.5kDa | NADH dehydrogenase (ubiquinone) activity                                                                                                                                                                                                                   |
| PTGR2   | prostaglandin reductase 2                                         | 13-prostaglandin reductase activity 15-oxoprostaglandin 13-oxidase activity                                                                                                                                                                                |
| HMGCS1  | 3-hydroxy-3-methylglutaryl-CoA synthase 1 (soluble)               | hydroxymethylglutaryl-CoA synthase activity drug binding isomerase activity protein homodimerization activity organic acid binding                                                                                                                         |
| IFNAR2  | interferon (alpha, beta and omega) receptor 2                     | type I interferon receptor activity protein binding protein kinase binding type I interferon binding                                                                                                                                                       |
| RNASET2 | ribonuclease T2                                                   | RNA binding ribonuclease activity ribonuclease T2 activity                                                                                                                                                                                                 |
| DMPK    | dystrophia myotonica-protein kinase                               | protein serine/threonine kinase activity protein binding ATP binding myosin phosphatase regulator activity heat shock protein binding metal ion binding                                                                                                    |
| COG8    | component of oligomeric golgi complex 8                           | None                                                                                                                                                                                                                                                       |
| BCO2    | beta-carotene oxygenase 2                                         | oxidoreductase activity, acting on single donors with incorporation of molecular oxygen, incorporation of two atoms of oxygen metal ion binding                                                                                                            |
| NAA25   | N(alpha)-acetyltransferase 25, NatB auxiliary subunit             | None                                                                                                                                                                                                                                                       |
| DDT     | D-dopachrome tautomerase                                          | dopachrome isomerase activity D-dopachrome decarboxylase activity                                                                                                                                                                                          |
| GSTT2   | glutathione S-transferase theta 2                                 | glutathione transferase activity                                                                                                                                                                                                                           |
| CSNK1G1 | casein kinase 1, gamma 1                                          | protein serine/threonine kinase activity ATP binding                                                                                                                                                                                                       |
| GSK3A   | glycogen synthase kinase 3 alpha                                  | protein serine/threonine kinase activity protein binding ATP binding protein kinase A catalytic subunit binding tau-protein kinase activity                                                                                                                |
| NHP2L1  | NHP2 non-histone chromosome protein 2-like 1 (S. cerevisiae)      | RNA binding protein binding snoRNA binding poly(A) RNA binding                                                                                                                                                                                             |
| HMGCR   | 3-hydroxy-3-methylglutaryl-CoA reductase                          | hydroxymethylglutaryl-CoA reductase (NADPH) activity protein binding hydroxymethylglutaryl-CoA                                                                                                                                                             |

|         |                                                                                  |                                                                                                                                                                                                                                                                              |
|---------|----------------------------------------------------------------------------------|------------------------------------------------------------------------------------------------------------------------------------------------------------------------------------------------------------------------------------------------------------------------------|
|         |                                                                                  | reductase activity protein homodimerization activity coenzyme binding NADPH binding                                                                                                                                                                                          |
| TNNI3K  | TNNI3 interacting kinase                                                         | protein kinase activity protein serine/threonine kinase activity protein binding ATP binding protein C-terminus binding troponin I binding metal ion binding                                                                                                                 |
| PPP3R1  | protein phosphatase 3, regulatory subunit B, alpha                               | calcium-dependent protein serine/threonine phosphatase activity calcium ion binding protein binding calmodulin binding protein domain specific binding                                                                                                                       |
| PPP1CB  | protein phosphatase 1, catalytic subunit, beta isozyme                           | protein binding phosphatase activity myosin phosphatase activity protein kinase binding metal ion binding myosin-light-chain-phosphatase activity                                                                                                                            |
| AARS    | alanyl-tRNA synthetase                                                           | tRNA binding aminoacyl-tRNA editing activity alanine-tRNA ligase activity ATP binding zinc ion binding amino acid binding                                                                                                                                                    |
| S100A7  | S100 calcium binding protein A7                                                  | calcium ion binding protein binding zinc ion binding zinc ion binding RAGE receptor binding                                                                                                                                                                                  |
| GBF1    | golgi brefeldin A resistant guanine nucleotide exchange factor 1                 | ARF guanyl-nucleotide exchange factor activity protein binding                                                                                                                                                                                                               |
| EIF4A3  | eukaryotic translation initiation factor 4A3                                     | mRNA binding ATP-dependent RNA helicase activity protein binding ATP binding poly(A) binding poly(A) RNA binding                                                                                                                                                             |
| SF3B1   | splicing factor 3b, subunit 1, 155kDa                                            | chromatin binding protein binding poly(A) RNA binding                                                                                                                                                                                                                        |
| MTHFS   | 5,10-methenyltetrahydrofolate synthetase (5-formyltetrahydrofolate cyclo-ligase) | ATP binding folic acid binding 5-formyltetrahydrofolate cyclo-ligase activity 5-formyltetrahydrofolate cyclo-ligase activity                                                                                                                                                 |
| SDHAF2  | succinate dehydrogenase complex assembly factor 2                                | protein binding                                                                                                                                                                                                                                                              |
| BANF1   | barrier to autointegration factor 1                                              | DNA binding protein binding                                                                                                                                                                                                                                                  |
| UBC     | ubiquitin C                                                                      | protease binding protein binding poly(A) RNA binding                                                                                                                                                                                                                         |
| RNGTT   | RNA guanylyltransferase and 5'-phosphatase                                       | mRNA guanylyltransferase activity polynucleotide 5'-phosphatase activity protein tyrosine phosphatase activity GTP binding protein tyrosine/serine/threonine phosphatase activity RNA guanylyltransferase activity triphosphatase activity                                   |
| PLK1    | polo-like kinase 1                                                               | protein kinase activity protein serine/threonine kinase activity protein serine/threonine kinase activity protein serine/threonine kinase activity protein binding ATP binding microtubule binding anaphase-promoting complex binding kinase activity protein kinase binding |
| PPP1R10 | protein phosphatase 1, regulatory subunit 10                                     | DNA binding protein phosphatase inhibitor activity poly(A) RNA binding metal ion binding                                                                                                                                                                                     |
| CDC7    | cell division cycle 7                                                            | protein kinase activity protein serine/threonine kinase activity protein binding ATP binding kinase activity metal ion binding                                                                                                                                               |
| TXNRD1  | thioredoxin reductase 1                                                          | thioredoxin-disulfide reductase activity protein binding electron carrier activity protein disulfide oxidoreductase activity flavin adenine dinucleotide binding NADP binding                                                                                                |

|          |                                                                        |                                                                                                                                                                                                                                                          |
|----------|------------------------------------------------------------------------|----------------------------------------------------------------------------------------------------------------------------------------------------------------------------------------------------------------------------------------------------------|
| MTAP     | methylthioadenosine phosphorylase                                      | phosphorylase activity S-methyl-5-thioadenosine phosphorylase activity                                                                                                                                                                                   |
| PTPN1    | protein tyrosine phosphatase, non-receptor type 1                      | protein tyrosine phosphatase activity protein tyrosine phosphatase activity insulin receptor binding protein binding zinc ion binding enzyme binding protein kinase binding receptor tyrosine kinase binding poly(A) RNA binding ephrin receptor binding |
| SLC25A22 | solute carrier family 25 (mitochondrial carrier: glutamate), member 22 | L-glutamate transmembrane transporter activity symporter activity                                                                                                                                                                                        |
| SERPINB2 | serpin peptidase inhibitor, clade B (ovalbumin), member 2              | serine-type endopeptidase inhibitor activity                                                                                                                                                                                                             |
| SARS     | seryl-tRNA synthetase                                                  | RNA binding serine-tRNA ligase activity ATP binding                                                                                                                                                                                                      |
| PPIA     | peptidylprolyl isomerase A (cyclophilin A)                             | peptidyl-prolyl cis-trans isomerase activity protein binding peptide binding poly(A) RNA binding virion binding unfolded protein binding                                                                                                                 |
| LSM6     | LSM6 homolog, U6 small nuclear RNA associated ( <i>S. cerevisiae</i> ) | protein binding poly(A) RNA binding                                                                                                                                                                                                                      |
| HGS      | hepatocyte growth factor-regulated tyrosine kinase substrate           | protein binding protein domain specific binding metal ion binding                                                                                                                                                                                        |
| PTPN23   | protein tyrosine phosphatase, non-receptor type 23                     | protein tyrosine phosphatase activity protein binding                                                                                                                                                                                                    |
| SNRPD3   | small nuclear ribonucleoprotein D3 polypeptide 18kDa                   | protein binding enzyme binding poly(A) RNA binding histone pre-mRNA DCP binding                                                                                                                                                                          |
| CKS1B    | CDC28 protein kinase regulatory subunit 1B                             | protein binding cyclin-dependent protein serine/threonine kinase regulator activity                                                                                                                                                                      |
| VPS28    | vacuolar protein sorting 28 homolog ( <i>S. cerevisiae</i> )           | protein binding                                                                                                                                                                                                                                          |
| XRN2     | 5'-3' exoribonuclease 2                                                | nuclease activity 5'-3' exoribonuclease activity zinc ion binding 5'-3' exonuclease activity poly(A) RNA binding                                                                                                                                         |
| DCTN5    | dynactin 5 (p25)                                                       | None                                                                                                                                                                                                                                                     |
| AURKA    | aurora kinase A                                                        | protein kinase activity protein serine/threonine kinase activity protein serine/threonine/tyrosine kinase activity protein binding ATP binding protein kinase binding ubiquitin protein ligase binding                                                   |
| NUP188   | nucleoporin 188kDa                                                     | None                                                                                                                                                                                                                                                     |
| THG1L    | tRNA-histidine guanylyltransferase 1-like ( <i>S. cerevisiae</i> )     | tRNA binding magnesium ion binding ATP binding GTP binding tRNA guanylyltransferase activity tRNA guanylyltransferase activity identical protein binding                                                                                                 |
| RAD51C   | RAD51 paralog C                                                        | four-way junction DNA binding DNA binding protein binding ATP binding DNA-dependent ATPase activity crossover junction endodeoxyribonuclease activity                                                                                                    |
| RAPGEF1  | Rap guanine nucleotide exchange factor (GEF) 1                         | protein binding Rap guanyl-nucleotide exchange factor activity Rap guanyl-nucleotide exchange factor activity SH3 domain binding                                                                                                                         |
| DCTN6    | dynactin 6                                                             | dynein binding                                                                                                                                                                                                                                           |
| TOMM20   | translocase of outer mitochondrial membrane 20 homolog (yeast)         | protein binding P-P-bond-hydrolysis-driven protein transmembrane transporter activity unfolded protein binding                                                                                                                                           |

|          |                                                             |                                                                                                                                                                                                                                                                                                                                                                                                                                                                                                   |
|----------|-------------------------------------------------------------|---------------------------------------------------------------------------------------------------------------------------------------------------------------------------------------------------------------------------------------------------------------------------------------------------------------------------------------------------------------------------------------------------------------------------------------------------------------------------------------------------|
| VCX3A    | variable charge, X-linked 3A                                | None                                                                                                                                                                                                                                                                                                                                                                                                                                                                                              |
| FCF1     | FCF1 rRNA-processing protein                                | poly(A) RNA binding                                                                                                                                                                                                                                                                                                                                                                                                                                                                               |
| DYNLRB1  | dynein, light chain, roadblock-type 1                       | microtubule motor activity identical protein binding                                                                                                                                                                                                                                                                                                                                                                                                                                              |
| ACTR10   | actin-related protein 10 homolog (S. cerevisiae)            | None                                                                                                                                                                                                                                                                                                                                                                                                                                                                                              |
| TMED2    | transmembrane emp24 domain trafficking protein 2            | protein binding                                                                                                                                                                                                                                                                                                                                                                                                                                                                                   |
| ARHGAP8  | Rho GTPase activating protein 8                             | Rho GTPase activator activity protein binding                                                                                                                                                                                                                                                                                                                                                                                                                                                     |
| PTPN11   | protein tyrosine phosphatase, non-receptor type 11          | phosphoprotein phosphatase activity protein tyrosine phosphatase activity protein tyrosine phosphatase activity non-membrane spanning protein tyrosine phosphatase activity non-membrane spanning protein tyrosine phosphatase activity SH3/SH2 adaptor activity insulin receptor binding protein binding protein domain specific binding receptor tyrosine kinase binding D1 dopamine receptor binding phospholipase binding insulin receptor substrate binding peptide hormone receptor binding |
| PPP1R2   | protein phosphatase 1, regulatory (inhibitor) subunit 2     | protein serine/threonine phosphatase inhibitor activity protein binding                                                                                                                                                                                                                                                                                                                                                                                                                           |
| TPSB2    | trypsin beta 2 (gene/pseudogene)                            | serine-type endopeptidase activity serine-type peptidase activity                                                                                                                                                                                                                                                                                                                                                                                                                                 |
| DHX37    | DEAH (Asp-Glu-Ala-His) box polypeptide 37                   | nucleic acid binding helicase activity ATP binding                                                                                                                                                                                                                                                                                                                                                                                                                                                |
| ALG1     | ALG1, chitobiosyldiphosphodolichol beta-mannosyltransferase | mannosyltransferase activity chitobiosyldiphosphodolichol beta-mannosyltransferase activity                                                                                                                                                                                                                                                                                                                                                                                                       |
| GOLGA6L1 | golgin A6 family-like 1                                     | None                                                                                                                                                                                                                                                                                                                                                                                                                                                                                              |
| S100G    | S100 calcium binding protein G                              | vitamin D binding calcium ion binding                                                                                                                                                                                                                                                                                                                                                                                                                                                             |

**Supplementary Table 2: Genes targeted by sgRNAs enriched in the non-invasive population**

| Symbol | GeneInfo                                            | Function                                                                                                                                                                   |
|--------|-----------------------------------------------------|----------------------------------------------------------------------------------------------------------------------------------------------------------------------------|
| MAP4K4 | mitogen-activated protein kinase kinase kinase 4    | protein serine/threonine kinase activity small GTPase regulator activity protein binding ATP binding                                                                       |
| AARS   | alanyl-tRNA synthetase                              | tRNA binding aminoacyl-tRNA editing activity alanine-tRNA ligase activity ATP binding zinc ion binding amino acid binding                                                  |
| NARS   | asparaginyl-tRNA synthetase                         | nucleic acid binding asparagine-tRNA ligase activity ATP binding                                                                                                           |
| ACTR2  | ARP2 actin-related protein 2 homolog (yeast)        | actin binding ATP binding                                                                                                                                                  |
| ABCE1  | ATP-binding cassette, sub-family E (OABP), member 1 | ATP binding ribonuclease inhibitor activity ATPase activity iron-sulfur cluster binding                                                                                    |
| TAOK1  | TAO kinase 1                                        | protein kinase activity protein serine/threonine kinase activity protein serine/threonine kinase activity protein binding ATP binding kinase activity transferase activity |
| GAPDH  | glyceraldehyde-3-phosphate dehydrogenase            | glyceraldehyde-3-phosphate dehydrogenase (NAD+) (phosphorylating) activity glyceraldehyde-3-phosphate                                                                      |

|         |                                                            |                                                                                                                                                                                                                                                                                                                                                                                                                                                                             |
|---------|------------------------------------------------------------|-----------------------------------------------------------------------------------------------------------------------------------------------------------------------------------------------------------------------------------------------------------------------------------------------------------------------------------------------------------------------------------------------------------------------------------------------------------------------------|
|         |                                                            | dehydrogenase (NAD+) (phosphorylating) activity protein binding microtubule binding peptidyl-cysteine S-nitrosylase activity identical protein binding NADP binding NAD binding                                                                                                                                                                                                                                                                                             |
| GGPS1   | geranylgeranyl diphosphate synthase 1                      | dimethylallyltranstransferase activity farnesyltranstransferase activity geranyltranstransferase activity metal ion binding                                                                                                                                                                                                                                                                                                                                                 |
| CKS1B   | CDC28 protein kinase regulatory subunit 1B                 | protein binding cyclin-dependent protein serine/threonine kinase regulator activity                                                                                                                                                                                                                                                                                                                                                                                         |
| SEH1L   | SEH1-like ( <i>S. cerevisiae</i> )                         | None                                                                                                                                                                                                                                                                                                                                                                                                                                                                        |
| CDK9    | cyclin-dependent kinase 9                                  | DNA binding chromatin binding protein kinase activity cyclin-dependent protein serine/threonine kinase activity protein binding ATP binding RNA polymerase II carboxy-terminal domain kinase activity snRNA binding transcription regulatory region DNA binding                                                                                                                                                                                                             |
| EEF2    | eukaryotic translation elongation factor 2                 | translation elongation factor activity GTPase activity GTP binding translation activator activity protein kinase binding poly(A) RNA binding                                                                                                                                                                                                                                                                                                                                |
| CDK1    | cyclin-dependent kinase 1                                  | protein kinase activity protein serine/threonine kinase activity cyclin-dependent protein serine/threonine kinase activity cyclin-dependent protein serine/threonine kinase activity protein binding ATP binding RNA polymerase II carboxy-terminal domain kinase activity cyclin binding Hsp70 protein binding histone kinase activity                                                                                                                                     |
| RBMXL1  | RNA binding motif protein, X-linked-like 1                 | nucleotide binding RNA binding                                                                                                                                                                                                                                                                                                                                                                                                                                              |
| DHX30   | DEAH (Asp-Glu-Ala-His) box helicase 30                     | chromatin binding double-stranded RNA binding protein binding ATP binding ATP-dependent helicase activity poly(A) RNA binding                                                                                                                                                                                                                                                                                                                                               |
| NGLY1   | N-glycanase 1                                              | peptide-N4-(N-acetyl-beta-glucosaminyl)asparagine amidase activity protein binding metal ion binding                                                                                                                                                                                                                                                                                                                                                                        |
| CAP1    | CAP, adenylate cyclase-associated protein 1 (yeast)        | actin binding                                                                                                                                                                                                                                                                                                                                                                                                                                                               |
| HARS    | histidyl-tRNA synthetase                                   | histidine-tRNA ligase activity ATP binding                                                                                                                                                                                                                                                                                                                                                                                                                                  |
| PPP1R8  | protein phosphatase 1, regulatory subunit 8                | DNA binding RNA binding endonuclease activity protein serine/threonine phosphatase inhibitor activity protein binding protein phosphatase type 1 regulator activity ribonuclease E activity                                                                                                                                                                                                                                                                                 |
| EFTUD1  | elongation factor Tu GTP binding domain containing 1       | translation elongation factor activity GTPase activity GTP binding ribosome binding                                                                                                                                                                                                                                                                                                                                                                                         |
| TRAPPC3 | trafficking protein particle complex 3                     | protein binding                                                                                                                                                                                                                                                                                                                                                                                                                                                             |
| PDGFRA  | platelet-derived growth factor receptor, alpha polypeptide | transmembrane receptor protein tyrosine kinase activity platelet-derived growth factor alpha-receptor activity platelet-derived growth factor alpha-receptor activity vascular endothelial growth factor-activated receptor activity platelet-derived growth factor receptor binding protein binding ATP binding vascular endothelial growth factor binding protein homodimerization activity platelet-derived growth factor binding platelet-derived growth factor binding |
| PFN1    | profilin 1                                                 | adenyl-nucleotide exchange factor activity actin binding receptor binding protein binding phosphatidylinositol-4,5-bisphosphate binding Rho GTPase binding poly(A) RNA binding proline-rich region binding                                                                                                                                                                                                                                                                  |

|        |                                                                          |                                                                                                                                                                               |
|--------|--------------------------------------------------------------------------|-------------------------------------------------------------------------------------------------------------------------------------------------------------------------------|
| FCGR1B | Fc fragment of IgG, high affinity Ib, receptor (CD64)                    | immunoglobulin receptor activity IgG binding                                                                                                                                  |
| MRPL43 | mitochondrial ribosomal protein L43                                      | structural constituent of ribosome poly(A) RNA binding                                                                                                                        |
| XPO1   | exportin 1                                                               | RNA binding transporter activity nucleocytoplasmic transporter activity protein binding Ran GTPase binding protein transporter activity protein domain specific binding       |
| ABCF1  | ATP-binding cassette, sub-family F (GCN20), member 1                     | protein binding ATP binding ATP binding translation factor activity, nucleic acid binding translation activator activity ATPase activity ribosome binding poly(A) RNA binding |
| BTAF1  | BTAF1 RNA polymerase II, B-TFIID transcription factor-associated, 170kDa | DNA binding sequence-specific DNA binding transcription factor activity helicase activity ATP binding                                                                         |
| YARS   | tyrosyl-tRNA synthetase                                                  | tRNA binding tyrosine-tRNA ligase activity signal transducer activity interleukin-8 receptor binding ATP binding poly(A) RNA binding                                          |
| NSF    | N-ethylmaleimide-sensitive factor                                        | protein binding ATP binding syntaxin-1 binding protein kinase binding PDZ domain binding protein complex binding ATPase activity, coupled metal ion binding                   |
| NHP2L1 | NHP2 non-histone chromosome protein 2-like 1 ( <i>S. cerevisiae</i> )    | RNA binding protein binding snoRNA binding poly(A) RNA binding                                                                                                                |
| ARPC3  | actin related protein 2/3 complex, subunit 3, 21kDa                      | actin binding structural constituent of cytoskeleton protein binding                                                                                                          |
| LSM6   | LSM6 homolog, U6 small nuclear RNA associated ( <i>S. cerevisiae</i> )   | protein binding poly(A) RNA binding                                                                                                                                           |
